# Supplementary material for: Drastic performance improvement of indoor organic photovoltaics using a novel laminated homojunction hole-transport layer
Source: Royal Society of Chemistry journal article supplement (doi:10.1039/d2ta04022k), 2022-01-01
Supplement: d2ta04022k1.pdf [file d2ta04022k1.pdf]

**Electronic Supplementary Information For:**

**Drastic performance improvement of indoor organic  
photovoltaics using novel laminated homojunction hole-  
transport layer**

Tae Hyuk Kim<sup>a</sup>, Justin Scott Neu<sup>b</sup>, Sung Hyun Kim<sup>a</sup>, Muhammad Ahsan Saeed<sup>a</sup>, Wei You<sup>\*b</sup> & Jae Won Shim<sup>\*a</sup>

Equivalent circuit model

The performance of the OPVs is often described with a single-diode equivalent circuit model, and

including one current source and two parasitic resistances, a shunt resistance ( $R_p$ ) and a series resistance ( $R_s$ ) under illumination. The  $R_p$  is related to the leakage current, recombination, *etc.*, and the  $R_s$  is originated from the resistive components of the device such as resistance of electrodes and bulk resistance of photoactive layers.

By using the Shockley Eq. <sup>1,2</sup>, the circuit model under illumination can be formulated, the  $J_{sc}$  and the  $V_{oc}$  can be expressed as follows,

$$J_{sc} = -\frac{1}{1 + \frac{R_s}{R_p}} \left[ J_{ph} - J_0 \left( \exp\left(\frac{|V_{sc}| R_s A}{nkT}\right) - 1 \right) \right] \quad (1)$$

$$V_{oc} = \frac{kT}{q} \ln \left\{ 1 + \frac{J_{ph}}{J_0} \left( 1 - \frac{V_{oc}}{J_{ph} R_p A} \right) \right\} \approx \frac{kT}{q} \ln \left\{ 1 + \frac{J_{ph}}{J_0} \right\} \quad (2)$$

, where  $J_{ph}$  is the photo-current density,  $J_0$  is the reverse saturation current density,  $n$  is the ideality factor,  $q$  is the elementary charge number ( $1.602 \times 10^{-19}$  C),  $k$  is the Boltzmann constant ( $8.617 \times 10^{-5}$  eV/K),  $T$  is temperature, and  $A$  is the area of the photoactive region. Also, when  $R_p$

$\gg R_s$  and  $J_{ph} = J_{sc}$ , Eq. (2) can be written as  $V_{oc} \approx \frac{kT}{q} \ln \left\{ 1 + \frac{J_{ph}}{J_0} \right\}$ , which seems to be independent of  $R_s$  and  $R_p$ . The  $R_s A$  and  $R_p A$  values were extracted from the inverse slope of the  $J$ - $V$  characteristics under illumination in the range of 0.96 – 1.0 V and near 0 V (close to the  $J_{sc}$  point), respectively. The FF ( $J_{max} \times V_{max} / J_{sc} \times V_{oc}$ ) can be shown as a function of the normalized  $V_{oc}$  ( $v_{oc} = eV_{oc}/nkT$ ), normalized  $R_s$  ( $r_s = R_s/R_{CH}$ ), and normalized  $R_p$  ( $r_p = R_p/R_{CH}$ ), where the characteristic resistance ( $R_{CH}$ ) is defined as  $R_{CH} = V_{oc}/(J_{sc}A)$ . The equation for the ideal FF<sub>0</sub> of the OPVs is expressed as follows:

$$FF_0 = \frac{v_{oc} - \ln(v_{oc} + 0.72)}{v_{oc} + 1} \quad (3)$$

where,  $R_s = 0$  and  $R_p = \infty$ . However, owing to the parasitic resistance effects, the real FF value should deviate from the ideal FF<sub>0</sub>, and thus, semi-empirical expressions with the parasitic effects are shown below:

$$FF_S = FF_0 (1 - 1.1r_s) + 0.19r_s^2, \quad (0 \leq r_s \leq 0.4, 1/r_p = 0) \quad (4)$$

and,

$$FF_{SP} = FF_0 \left\{ 1 - \frac{(v_{oc} + 0.7)FF_S}{v_{oc} r_p} \right\}, \quad (0 \leq r_s + 1/r_p \leq 0.4) \quad (5)$$

$$V_{oc} = \frac{E_{gap}}{q} - \frac{kT}{q} \ln \left\{ \frac{(1 - P_D)\gamma N_C^2}{P_D G} \right\} \quad (6)$$

where  $E_{gap}$  is the energy difference between the HOMO-donor and LUMO-acceptor,  $q$  is the elementary charge,  $k$  is the Boltzmann constant,  $T$  is temperature in Kelvin,  $P_D$  is the dissociation

probability of the electron (e)-hole (h) pairs,  $\gamma$  is the Langevin recombination constant,  $N_C$  is the effective density of states, and  $G$  is the generation rate of bound e-h pairs.

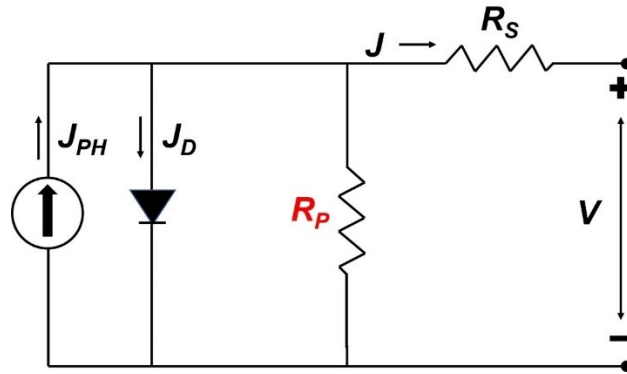

**Fig. S1.** Parasitic resistance effects based on the single-diode equivalent circuit model.

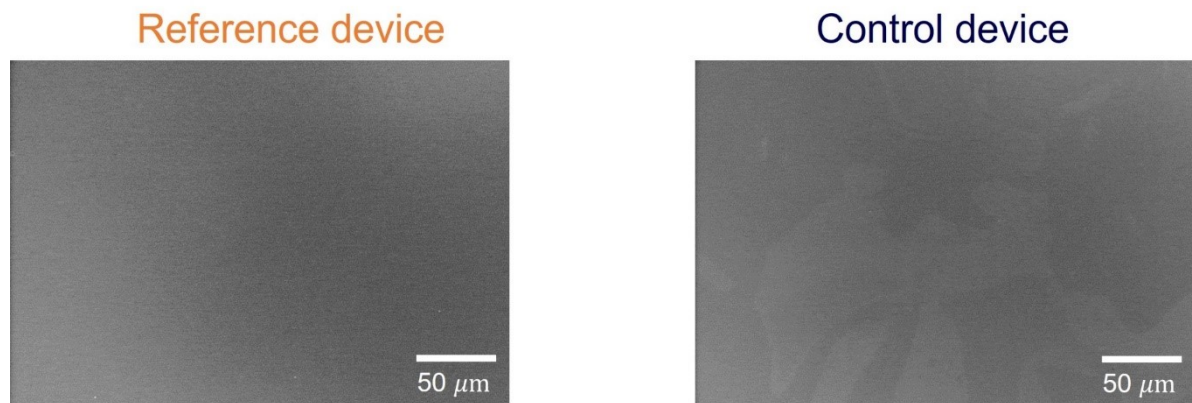

**Fig. S2.** The presence of PTQ10 is verified based on the top-down view of each SEM image.

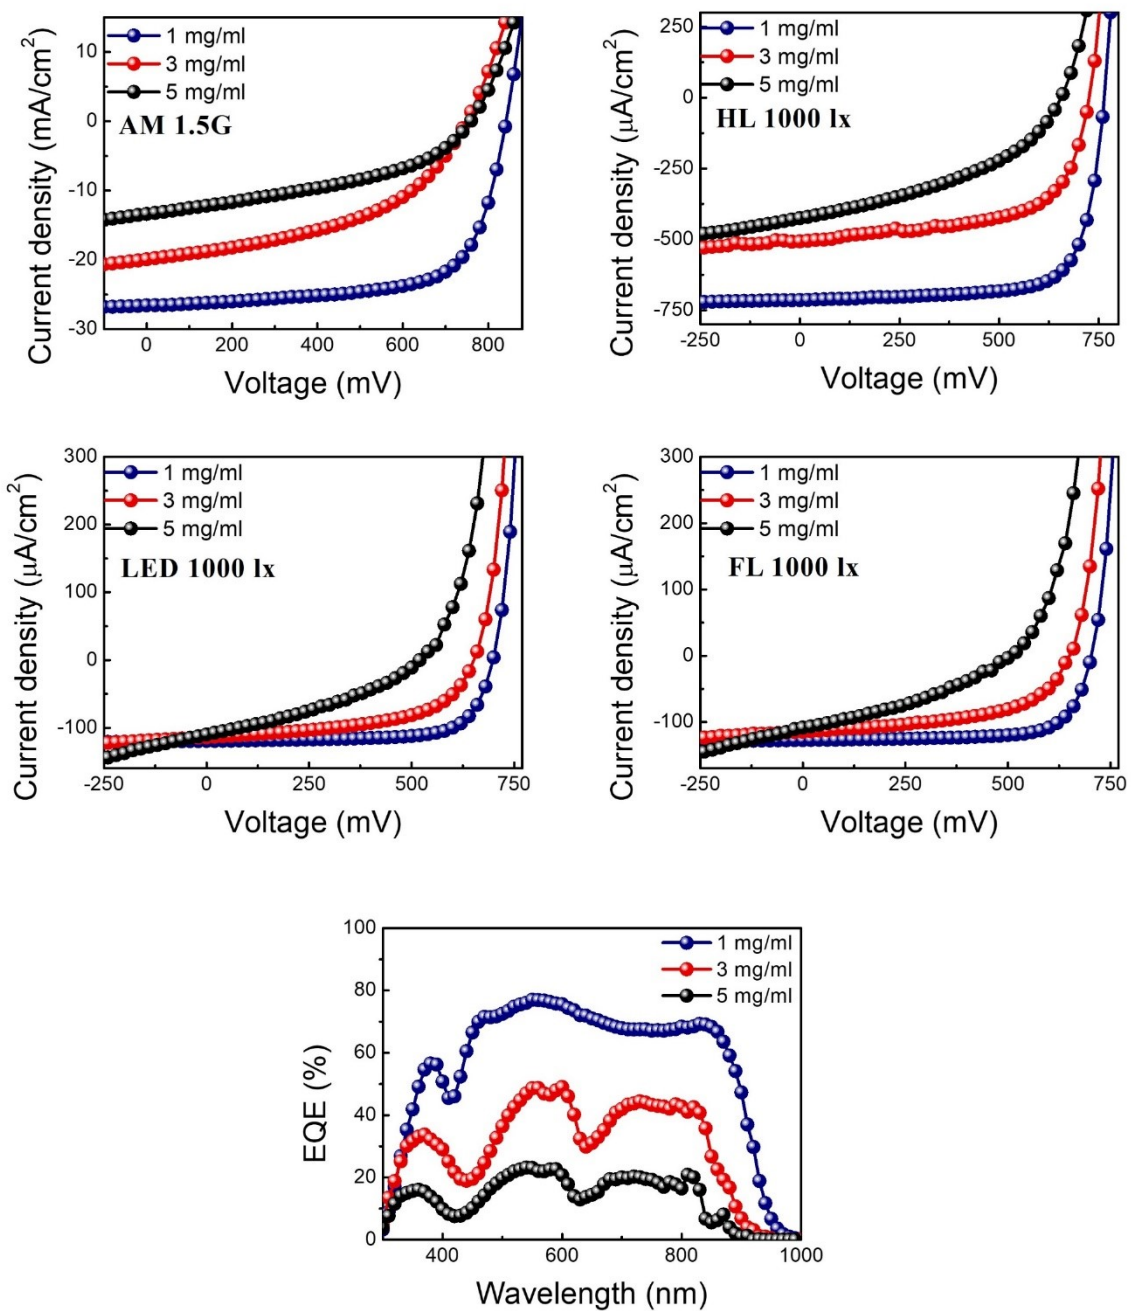

**Fig. S3.** Photovoltaic performance of the PTQ10-based OPV with different concentration.

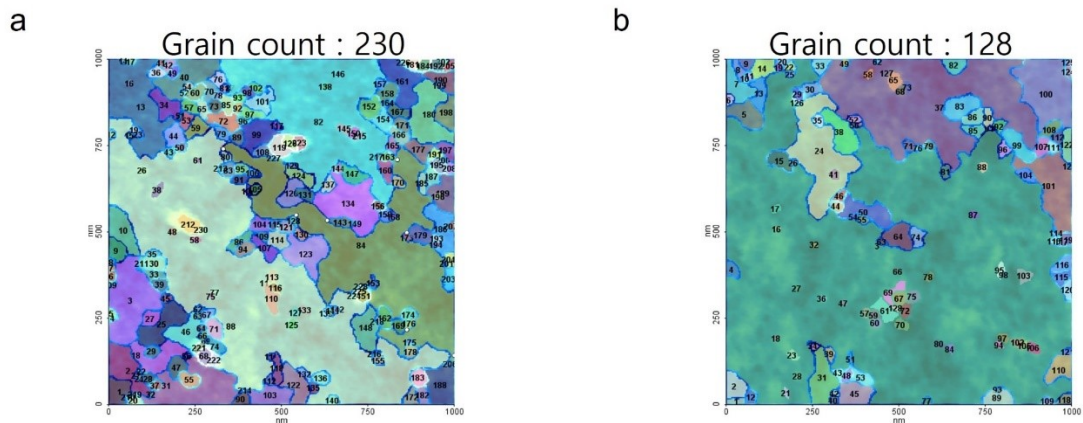

**Fig. S4.** 2D AFM grain-count drawings (a) PTQ10:Y6 and (b) PTQ10:Y6/PTQ10

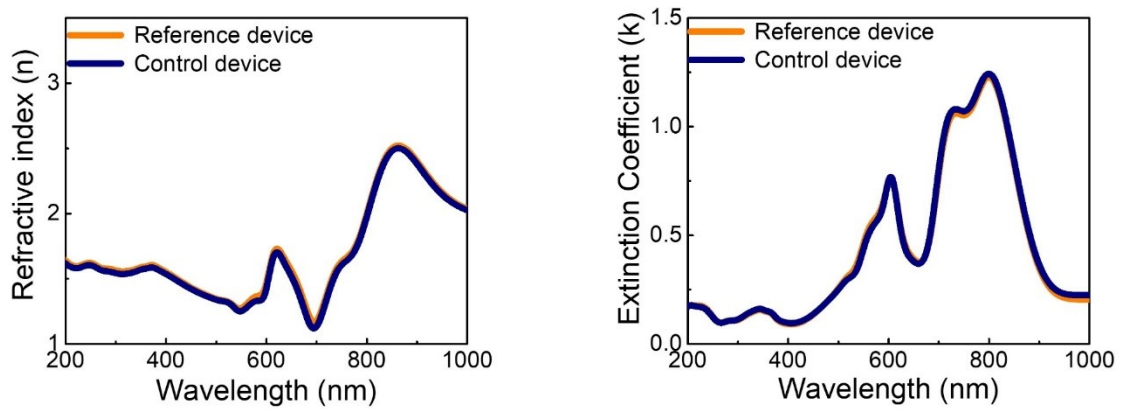

**Fig. S5.** Complex refractive index ( $n$ ,  $k$ ) of PTQ10 transport layers used for the finite-difference time-domain simulations.

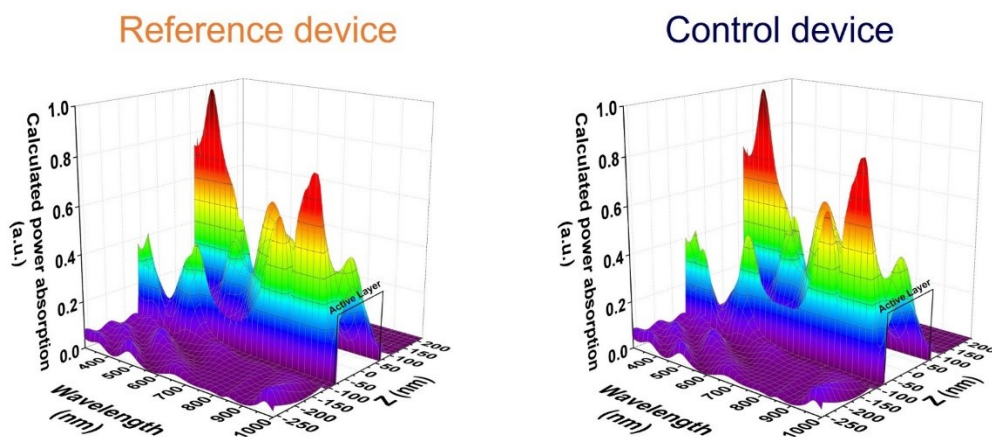

**Fig. S6.** Power-absorption profile of multicomponent photoactive blends obtained by the finite-difference time-domain method.

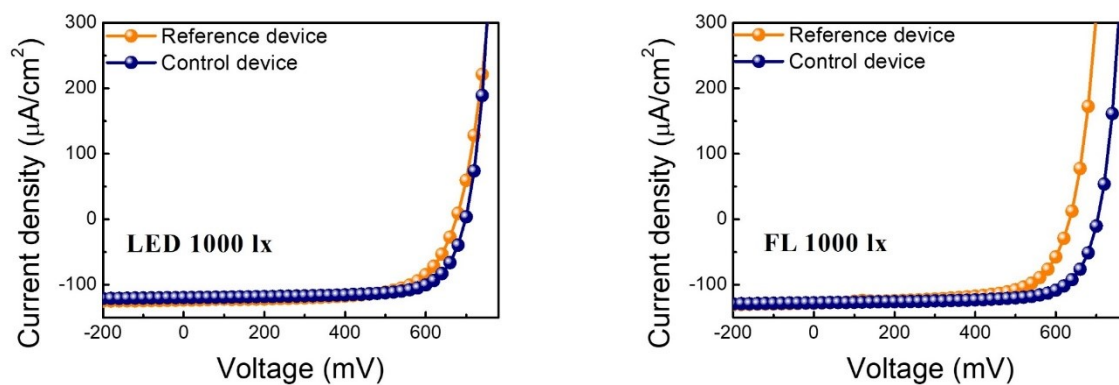

**Fig. S7.** Photovoltaic performance of Reference and Control devices under indoor (LED 1000 lx; FL 1000 lx) luminance.

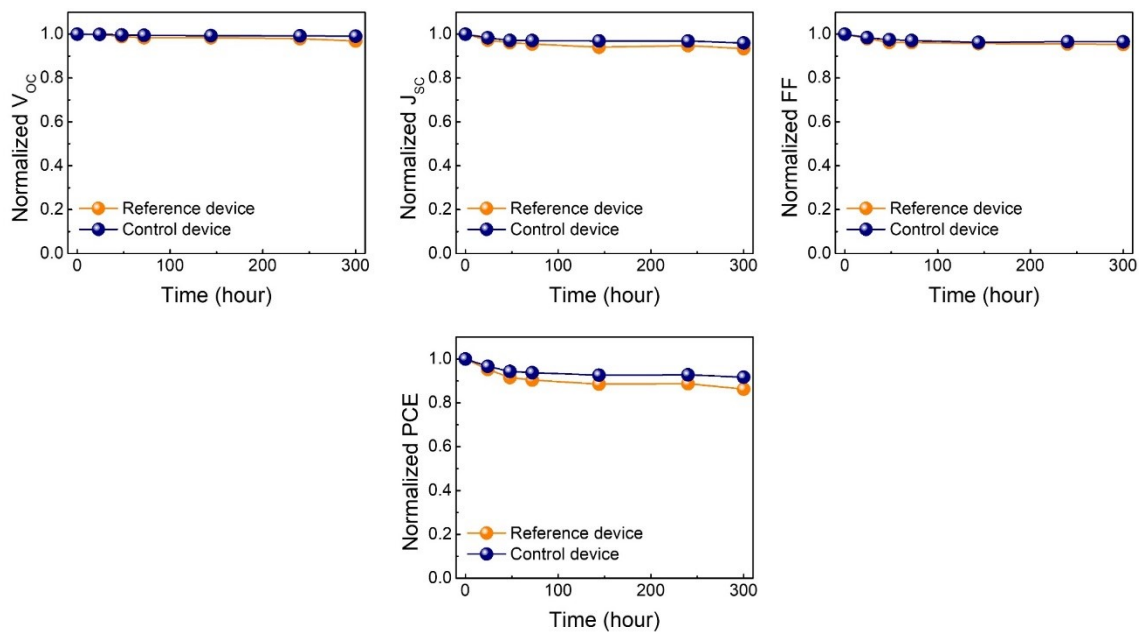

**Fig. S8.** Device stability of Reference and Control devices.

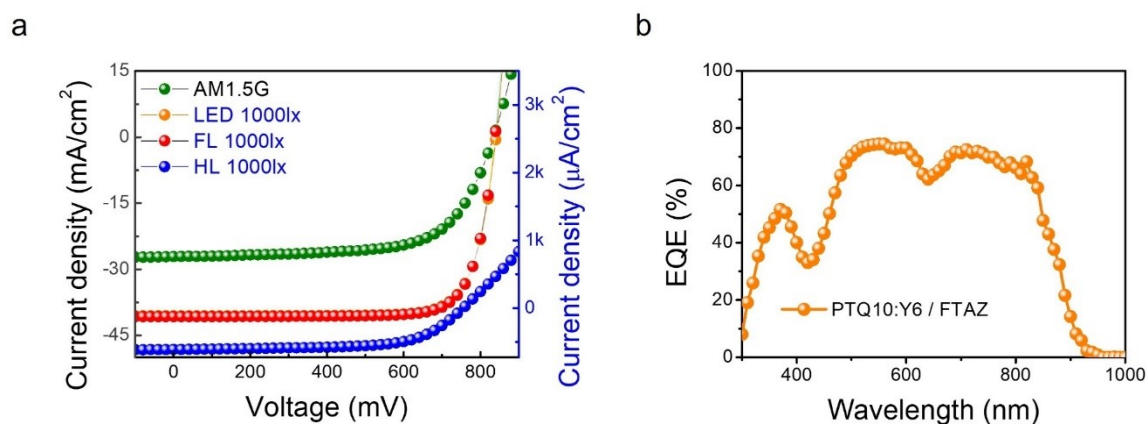

**Fig. S9.** (a) Photovoltaic performance of FTAZ-based device under outdoor and indoor (LED 1000 lx; FL 1000 lx; HL 1000 lx) luminance, (b) EQE spectra.

**Table S1.** Photovoltaic performance parameter of the PTQ10-based OPV with different concentration.

| Light source                             | PTQ10 concentration (mg/ml) | $V_{oc}$ (mV) | $J_{sc}$                     |                                    | FF (%)         | PCE (%)        |
|------------------------------------------|-----------------------------|---------------|------------------------------|------------------------------------|----------------|----------------|
|                                          |                             |               | (1-sun: mA/cm <sup>2</sup> ) | (Indoor: $\mu$ A/cm <sup>2</sup> ) |                |                |
| 1-sun<br>(100mW/cm <sup>2</sup> )        | 1                           | 841 $\pm$ 11  | 26.9 $\pm$ 1.2               |                                    | 66.8 $\pm$ 1.1 | 15.1 $\pm$ 0.5 |
|                                          | 3                           | 740 $\pm$ 8   | 19.7 $\pm$ 0.3               |                                    | 45.1 $\pm$ 1.5 | 6.6 $\pm$ 0.4  |
|                                          | 5                           | 774 $\pm$ 18  | 15.8 $\pm$ 2.7               |                                    | 41.7 $\pm$ 1.7 | 5.1 $\pm$ 0.8  |
| LED 1000 lx<br>(0.23mW/cm <sup>2</sup> ) | 1                           | 698 $\pm$ 2   | 119.5 $\pm$ 0.3              |                                    | 72.8 $\pm$ 0.1 | 26.4 $\pm$ 0.1 |
|                                          | 3                           | 651 $\pm$ 3   | 113.9 $\pm$ 0.1              |                                    | 54.8 $\pm$ 0.1 | 17.7 $\pm$ 0.1 |
|                                          | 5                           | 516 $\pm$ 5   | 110.2 $\pm$ 0.1              |                                    | 34.9 $\pm$ 0.4 | 8.6 $\pm$ 0.1  |
| FL 1000 lx<br>(0.27mW/cm <sup>2</sup> )  | 1                           | 703 $\pm$ 2   | 126.0 $\pm$ 3.1              |                                    | 72.9 $\pm$ 0.3 | 23.9 $\pm$ 0.6 |
|                                          | 3                           | 649 $\pm$ 2   | 114.1 $\pm$ 0.9              |                                    | 54.0 $\pm$ 0.1 | 14.8 $\pm$ 0.2 |
|                                          | 5                           | 60 $\pm$ 7    | 104.9 $\pm$ 0.7              |                                    | 23.8 $\pm$ 0.6 | 0.6 $\pm$ 0.1  |
| HL 1000 lx<br>(7.0mW/cm <sup>2</sup> )   | 1                           | 785 $\pm$ 8   | 685.2 $\pm$ 2.5              |                                    | 74.0 $\pm$ 0.3 | 5.7 $\pm$ 0.2  |
|                                          | 3                           | 726 $\pm$ 2   | 507.5 $\pm$ 0.2              |                                    | 61.4 $\pm$ 0.1 | 3.2 $\pm$ 0.1  |
|                                          | 5                           | 191 $\pm$ 4   | 538.6 $\pm$ 3.2              |                                    | 26.5 $\pm$ 0.5 | 0.4 $\pm$ 0.1  |

**Table S2.** In finite-difference time-domain (FDTD) simulation, the ideal current density of Reference and Control devices under halogen (HL) lighting.

| Sample name      | $J_{ph,ideal}$                       |                                       |
|------------------|--------------------------------------|---------------------------------------|
|                  | HL 500lx ( $\mu$ A/cm <sup>2</sup> ) | HL 1000lx ( $\mu$ A/cm <sup>2</sup> ) |
| Reference device | 659.114                              | 973.944                               |
| Control device   | 647.352                              | 956.809                               |

**Table S3.** Photovoltaic performance parameter of the PTQ10-based OPV under indoor (LED 1000lx; FL 1000lx) luminance.

| Light source | Structure | $V_{oc}$ | $J_{sc}$ | FF | PCE |
|--------------|-----------|----------|----------|----|-----|
|--------------|-----------|----------|----------|----|-----|



|                                          |                  | (mV)        | ( $\mu\text{A}/\text{cm}^2$ ) | (%)            | (%)            |
|------------------------------------------|------------------|-------------|-------------------------------|----------------|----------------|
| LED 1000 lx<br>(0.23mW/cm <sup>2</sup> ) | Reference device | 675 $\pm$ 2 | 123.4 $\pm$ 0.1               | 68.3 $\pm$ 0.3 | 23.7 $\pm$ 0.1 |
|                                          | Control device   | 698 $\pm$ 2 | 119.5 $\pm$ 0.3               | 72.8 $\pm$ 0.1 | 26.4 $\pm$ 0.1 |
| FL 1000 lx<br>(0.27mW/cm <sup>2</sup> )  | Reference device | 680 $\pm$ 2 | 124.2 $\pm$ 2.0               | 67.5 $\pm$ 0.4 | 21.1 $\pm$ 0.4 |
|                                          | Control device   | 703 $\pm$ 2 | 126.0 $\pm$ 3.1               | 72.9 $\pm$ 0.3 | 23.9 $\pm$ 0.6 |

**Table S4.** Photovoltaic performance parameter of the FTAZ-based OPV under outdoor and indoor (LED 1000 lx; FL 1000 lx; HL 1000 lx) luminance.

| Light source                              | $V_{oc}$<br>(mV) | $J_{sc}$<br>(1-sun: mA/cm <sup>2</sup> )<br>(Indoor: $\mu\text{A}/\text{cm}^2$ ) | FF<br>(%)      | PCE<br>(%)     |
|-------------------------------------------|------------------|----------------------------------------------------------------------------------|----------------|----------------|
| 1-sun<br>(100 mW/cm <sup>2</sup> )        | 833 $\pm$ 2      | 27.1 $\pm$ 0.1                                                                   | 66.6 $\pm$ 0.2 | 15.0 $\pm$ 0.1 |
| LED 1000 lx<br>(0.23 mW/cm <sup>2</sup> ) | 688 $\pm$ 4      | 120.7 $\pm$ 4.3                                                                  | 69.0 $\pm$ 0.8 | 24.9 $\pm$ 0.3 |
| FL 1000 lx<br>(0.27 mW/cm <sup>2</sup> )  | 692 $\pm$ 2      | 125.4 $\pm$ 2.2                                                                  | 68.5 $\pm$ 0.9 | 22.0 $\pm$ 0.2 |
| HL 1000 lx<br>(7.0 mW/cm <sup>2</sup> )   | 756 $\pm$ 3      | 650.5 $\pm$ 15.4                                                                 | 67.6 $\pm$ 0.1 | 4.7 $\pm$ 0.1  |

## References

- 1 J. S. Goo, J. H. Lee, S. C. Shin, J. S. Park and J. W. Shim, *J. Mater. Chem. A*, 2018, **6**, 23464–23472.
- 2 B. Kippelen and J. L. Brédas, *Energy Environ. Sci.*, 2009, **2**, 251–261.
